# Supplementary material for: Novel Prognostic Role of Serum CA19-9 Identified in Colorectal Terminal Tumor Site and Tubular Adenocarcinoma
Source: Research Square preprint supplement (doi:10.21203/rs.3.rs-119994/v1), 2020-12-10
Supplement: Supplementary file 1 [file 1341e57c521d512489f3f1d3.xlsx]

## Sheet: table 1
Table. 1. Statistics summary of each primary tumor site in colorectal cancer.
Tumor location	tumor location number	Gender		Age group (years)				CA19-9 levels		ALB	CRP	CEA	OS (mean, months)	5-year survival rate
		male	female	<50	50-60	61-70	>70	1	2	(≦40g/L)/All (%)	(>8mg/L)/All (%)	(>5ug/L)/All (%)
Transverse colon	17/1006(1.7%)	8	9	4	7	3	3	2	0	3	3	3	57	7/17 (41%)
Ileocecal	45/1006(4.5%)	21	24	4	4	17	20	24	0	16	9	8	53	14/45 (31%)
Descending colon	11/1006 (1.1%)	4	7	3	3	1	4	0	4	2	2	3	54	4/11 (36%)
Colon	63/1006 (6.3%)	35	28	9	15	22	17	0	0	34	16	23	72	49/63 (78%)
Hepatic flexure of Colon	8/1006 (0.8%)	6	2	0	1	4	3	6	0	2	1	1	39	1/8 (12%)
Ascending colon	24/1006 (2.4%)	11	13	7	6	6	5	14	0	3	1	6	56	9/24 (38%)
Junction of the rectum and sigmoid	6/1006 (0.6%)	3	3	0	1	2	3	0	3	2	1	2	39	1/6 (17%)
Left hemicolon	19/1006 (1.9%)	9	10	3	7	4	5	0	6	5	4	6	56	8/19 (42%)
Right hemicolon	76/1006 (7.6%)	42	34	11	21	27	17	27	0	26	16	15	59	37/56 (49%)
Sigmoid	140/1006 (14%)	86	54	10	36	49	45	1	55	37	15	22	62	70/140 (50%)
Rectum	597/1006 (59%)	341	256	73	172	191	160	1	191	122	47	131	59	287/597(48%)
Terminal tumor site	737/1006 (73%)	427	310	83	208	240	205	2	246	159/439 (36%)	62/439 (14%)	153/439 (35%)	60	357/737 (48%)
Other tumor sites	269/1006 (27%)	139	130	41	65	86	77	73	13	93/163 (57%)	53/163 (33%)	67/163 (41%)	59	130/269 (48%)
