# Supplementary material for: Novel Prognostic Role of Serum CA19-9 Identified in Colorectal Terminal Tumor Site and Tubular Adenocarcinoma
Source: Research Square preprint supplement (doi:10.21203/rs.3.rs-119994/v1), 2020-12-10
Supplement: Supplementary file 2 [file 400f17ac52685bfca8cee37d.xlsx]

## Sheet: Table S1
	Table S1. Summary of 8 physiological indicators colorectal cancer cases.
	Characteristics	patients number
	Leukocyte levels
	abnormal	81
	4~10×10^9/L	521
	Blood platelet levels
	abnormal	85
	100~300×10^9/L	517
	Neutrophil levels
	abnormal	67
	1.80~6.30×10^9/L	535
	Lymphocyte levels
	abnormal	31
	0.8~3.5×10^9/L	571
	Monocyte levels
	abnormal	46
	0.12~0.8×10^9/L	556
	Serum albumin levels (ALB)
	abnormal	252
	40~55g/L	350
	CRP
	abnormal	115
	0~8mg/L	487
	CEA
	abnormal	220
	0~5ug/L	382
