# Supplementary material for: Novel Prognostic Role of Serum CA19-9 Identified in Colorectal Terminal Tumor Site and Tubular Adenocarcinoma
Source: Research Square preprint supplement (doi:10.21203/rs.3.rs-119994/v1), 2020-12-10
Supplement: Supplementary file 3 [file ee7561ed3da3ce7a8e9659bf.xlsx]

## Sheet: Table 2
Table 2. Chacterization of different primary tumor sites in early and advanced stage CRC.
Tumor Characteristics	Stage
Primary Site location	Early		Advanced
rectum	247	0.416526	346	0.583474
sigmoid	54	0.385714	86	0.614286
right hemicolon	23	0.302632	53	0.697368
colon	26	0.412698	37	0.587302
ileocecal	13	0.288889	32	0.711111
ascending colon	7	0.291667	17	0.708333
left hemicolon	4	0.210526	15	0.789474
transverse colon	4	0.235294	13	0.764706
hepatic flexure of Colon	0	0	8	1
descending colon	6	0.545455	5	0.454545
Junction of the rectum and sigmoid	1	0.166667	5	0.833333
Summary
Terminal tumor sites	301	0.410641	432	0.589359
Other tumor sites	84	0.312268	185	0.687732
